# Supplementary material for: Inflammatory landscape in Xeroderma pigmentosum patients with cutaneous melanoma
Source: PubMed Central journal article supplement (PMC9381529; doi:10.1038/s41598-022-17928-z), 2022-08-16
Supplement: 41598_2022_17928_MOESM1_ESM.pdf [file 41598_2022_17928_MOESM1_ESM.pdf]

## Inflammatory landscape in Xeroderma pigmentosum patients with cutaneous melanoma

Asma Chikhaoui<sup>1,2</sup>, Meriem Jones<sup>3</sup>, Tadeja Režen<sup>4</sup>, Melika Ben Ahmed<sup>5</sup>, Chokri Naouali<sup>1,2</sup>, Radovan Komel<sup>4</sup>, Mohamed Zghal<sup>6</sup>, Samir Boubaker<sup>1,2</sup>, Sonia Abdelhak<sup>1,2</sup>, Houda Yacoub-Youssef<sup>1,2\*</sup>

1 Laboratoire de Génomique Biomédicale et Oncogénétique (LR16IPT05), Institut Pasteur de Tunis, Tunisie.

2 Université Tunis El Manar, Tunis, Tunisie.

3 Département de Dermatologie, Hôpital Charles Nicolle de Tunis, Tunisie.

4 Centre for Functional genomics and Bio-Chips & Medical Centre for Molecular Biology, Institute of Biochemistry and Molecular Genetics, Faculty of Medicine, University of Ljubljana, Ljubljana, Slovenia.

5 Laboratoire de Transmission, Contrôle et Immunobiologie de l'infection, LR16IPT02, Institut Pasteur de Tunis Université de Tunis El Manar I, 2092 Tunis, Tunisie.

6 Association for the support of children with Xeroderma pigmentosum (enfants de la lune en Tunisie).

| <u>Gene ID</u> | <u>Gene Description</u> | <u>SP-Mel</u> |         | <u>XP-Mel</u> |         |
|----------------|-------------------------|---------------|---------|---------------|---------|
|                |                         | Fold change   | p-value | Fold change   | p-value |
| <i>LTC4S</i>   | Leukotriene C4 Synthase | 0.60          | 0.819   | <b>0.24</b>   | 0.352   |
| <i>BDKRBI</i>  | Bradykinin Receptor B1  | 1.03          | 0.601   | <b>0.48</b>   | 0.442   |
| <i>C2</i>      | Complement C2           | <b>2.66</b>   | 0.311   | 1.50          | 0.578   |
| <i>C4A</i>     | Complement C4a          | <b>3.96</b>   | 0.149   | 0.91          | 0.665   |
| <i>C4B</i>     | Complement C4b          | <b>10.24</b>  | 0.170   | 1.30          | 0.686   |

|             |                                                      |             |       |             |       |
|-------------|------------------------------------------------------|-------------|-------|-------------|-------|
| <i>C6</i>   | Complement C6                                        | <b>0.14</b> | 0.375 | 1.14        | 0.798 |
| <i>C9</i>   | Complement C9                                        | 0.69        | 0.745 | <b>0.14</b> | 0.335 |
| <i>CCL2</i> | chemokine ligand 2                                   | <b>2.10</b> | 0.229 | 1.02        | 0.921 |
| <i>CCL3</i> | chemokine ligand 3                                   | <b>3.94</b> | 0.374 | 1.20        | 0.928 |
| <i>CCL4</i> | Chemokine (C-C motif) ligand 4                       | <b>2.29</b> | 0.429 | 1.22        | 0.858 |
| <i>CFB</i>  | Complement factor B                                  | <b>4.13</b> | 0.383 | <b>2.43</b> | 0.539 |
| <i>CP</i>   | Ceruloplasmin (ferroxidase)                          | <b>0.30</b> | 0.247 | 0.56        | 0.323 |
| <i>CRP</i>  | C-reactive protein (CRP)                             | 1.53        | 0.651 | <b>0.14</b> | 0.339 |
| <i>CSF1</i> | Colony stimulating factor 1 (macrophage)             | <b>2.19</b> | 0.426 | 1.18        | 0.652 |
| <i>CSF2</i> | Colony stimulating factor 2 (granulocyte-macrophage) | <b>2.50</b> | 0.440 | 1.08        | 0.761 |
| <i>CSF3</i> | Colony stimulating factor 3 (granulocyte)            | <b>2.36</b> | 0.429 | <b>0.39</b> | 0.441 |
| <i>DRD4</i> | Dopamine Receptor D4                                 | 1.47        | 0.497 | <b>0.47</b> | 0.463 |
| <i>F11</i>  | Coagulation factor XI                                | 1.29        | 0.533 | <b>0.10</b> | 0.361 |
| <i>F12</i>  | Coagulation factor XII (Hageman factor)              | 1.18        | 0.550 | <b>0.48</b> | 0.446 |
| <i>F8</i>   | Coagulation factor VIII, procoagulant component      | 1.51        | 0.721 | <b>0.37</b> | 0.390 |
| <i>HP</i>   | Haptoglobin                                          | <b>3.78</b> | 0.621 | <b>3.35</b> | 0.504 |
| <i>HRH2</i> | Histamine receptor H2                                | <b>7.19</b> | 0.164 | <b>0.37</b> | 0.351 |
| <i>HRH3</i> | Histamine receptor H3                                | <b>2.40</b> | 0.454 | <b>0.47</b> | 0.524 |

|               |                                |             |       |             |       |
|---------------|--------------------------------|-------------|-------|-------------|-------|
| <i>HRH4</i>   | Histamine receptor H4          | 0.72        | 0.528 | <b>0.12</b> | 0.345 |
| <i>IFNA1</i>  | Interferon, alpha 1            | <b>0.38</b> | 0.600 | <b>0.08</b> | 0.349 |
| <i>IFNA10</i> | Interferon, alpha 10           | <b>2.69</b> | 0.613 | 0.55        | 0.397 |
| <i>IFNA2</i>  | Interferon, alpha 2            | 0.51        | 0.664 | <b>0.15</b> | 0.328 |
| <i>IFNA14</i> | Interferon, alpha 14           | <b>0.36</b> | 0.882 | <b>0.12</b> | 0.324 |
| <i>IFNA16</i> | Interferon, alpha 16           | <b>0.40</b> | 0.688 | <b>0.11</b> | 0.376 |
| <i>IFNA17</i> | Interferon, alpha 17           | <b>0.11</b> | 0.678 | <b>0.31</b> | 0.403 |
| <i>IFNA21</i> | Interferon, alpha 21           | 0.57        | 0.566 | <b>0.10</b> | 0.349 |
| <i>IFNA4</i>  | Interferon, alpha 4            | <b>0.40</b> | 0.861 | <b>0.12</b> | 0.360 |
| <i>IFNA5</i>  | Interferon, alpha 5            | 1.18        | 0.559 | <b>0.18</b> | 0.341 |
| <i>IFNA6</i>  | Interferon, alpha 6            | 1.02        | 0.910 | <b>0.12</b> | 0.345 |
| <i>IFNA7</i>  | Interferon, alpha 7            | 1.40        | 0.484 | <b>0.08</b> | 0.345 |
| <i>IFNA8</i>  | Interferon, alpha 8            | 0.57        | 0.628 | <b>0.14</b> | 0.364 |
| <i>IFNB1</i>  | Interferon, beta 1, fibroblast | 0.62        | 0.444 | <b>0.41</b> | 0.554 |
| <i>IFNG</i>   | Interferon, gamma              | 1.03        | 0.725 | <b>0.33</b> | 0.389 |
| <i>IFNW1</i>  | Interferon, omega 1            | <b>2.22</b> | 0.895 | 0.50        | 0.438 |
| <i>IL-10</i>  | Interleukin 10                 | 0.96        | 0.490 | <b>0.41</b> | 0.382 |
| <i>IL-1B</i>  | Interleukin 1, beta            | 1.32        | 0.706 | <b>2.25</b> | 0.335 |

|                 |                                                                    |             |       |             |              |
|-----------------|--------------------------------------------------------------------|-------------|-------|-------------|--------------|
| <i>IL-8</i>     | Interleukin 8                                                      | <b>9.99</b> | 0.378 | <b>8.42</b> | 0.388        |
| <i>KLK1</i>     | Kallikrein 1                                                       | <b>0.27</b> | 0.747 | <b>0.27</b> | 0.371        |
| <i>KLK10</i>    | Kallikrein-related peptidase 10                                    | 1.23        | 0.627 | <b>2.03</b> | 0.102        |
| <i>KLK11</i>    | Kallikrein-related peptidase 1A                                    | <b>0.42</b> | 0.157 | 1.00        | 0.904        |
| <i>KLK12</i>    | Kallikrein-related peptidase 12                                    | <b>3.47</b> | 0.419 | <b>0.38</b> | 0.463        |
| <i>KLK13</i>    | Kallikrein-related peptidase 13                                    | 0.66        | 0.657 | <b>2.49</b> | 0.111        |
| <i>KLK14</i>    | Kallikrein-related peptidase 14                                    | 0.61        | 0.480 | <b>0.47</b> | 0.375        |
| <i>KLK15</i>    | Kallikrein-related peptidase 15                                    | <b>4.54</b> | 0.369 | 1.41        | 0.642        |
| <i>KLK2</i>     | Kallikrein-related peptidase 2                                     | 1.12        | 0.455 | <b>0.22</b> | 0.364        |
| <i>KLK5</i>     | Kallikrein-related peptidase 5                                     | 1.41        | 0.364 | <b>0.50</b> | 0.364        |
| <i>KLK6</i>     | Kallikrein-related peptidase 6                                     | 0.70        | 0.710 | <b>5.00</b> | <b>0.032</b> |
| <i>LTB4R2</i>   | Leukotriene B4 receptor 2                                          | 1.01        | 0.627 | <b>0.46</b> | 0.418        |
| <i>PAFAH1B2</i> | Platelet-activating factor acetylhydrolase 1b, catalytic subunit 2 | <b>2.78</b> | 0.242 | 1.26        | 0.548        |
| <i>PAFAH1B3</i> | Platelet-activating factor acetylhydrolase 1b, catalytic subunit 3 | <b>3.08</b> | 0.391 | 1.49        | 0.768        |
| <i>PAFAH2</i>   | Platelet-activating factor acetylhydrolase 2                       | 0.81        | 0.528 | <b>2.45</b> | 0.892        |
| <i>PDF</i>      | Peptide deformylase                                                | 0.65        | 0.753 | <b>0.45</b> | 0.272        |
| <i>PDGFA</i>    | Platelet-derived growth factor alpha polypeptide                   | 1.14        | 0.994 | <b>0.40</b> | 0.307        |
| <i>PDGFB</i>    | platelet derived growth factor subunit B                           | <b>2.43</b> | 0.502 | 0.85        | 0.585        |

|              |                                       |             |       |             |       |
|--------------|---------------------------------------|-------------|-------|-------------|-------|
| <i>PTGS1</i> | Prostaglandin-endoperoxide synthase 1 | 0.95        | 0.652 | <b>4.51</b> | 0.578 |
| <i>PTGS2</i> | Prostaglandin-endoperoxide synthase 2 | <b>2.44</b> | 0.375 | 1.30        | 0.515 |
| <i>TGFA</i>  | Transforming growth factor, alpha     | <b>5.24</b> | 0.309 | 0.85        | 0.595 |
| <i>TGFB1</i> | Transforming growth factor, beta 1    | <b>2.31</b> | 0.832 | <b>2.90</b> | 0.505 |
| <i>TNF</i>   | Tumor necrosis factor                 | <b>2.56</b> | 0.485 | 0.62        | 0.600 |

**Supplementary Table S1 : Differential gene expression of inflammatory genes by PCR array (Threshold set as 0,5>fold change>2)**

|   | 1        | 2        | 3      | 4     | 5     | 6      | 7      | 8      | 9        | 10       | 11       | 12       |
|---|----------|----------|--------|-------|-------|--------|--------|--------|----------|----------|----------|----------|
| A | HRH1     | HRH2     | HRH3   | HRH4  | KLK1  | KLK2   | KLK3   | KLK4   | KLK5     | KLK6     | KLK7     | KLK8     |
| B | KLK9     | KLK10    | KLK11  | KLK12 | KLK13 | KLK14  | KLK15  | BDKRB1 | BDKRB2   | LTB4R    | LTB4R2   | LTC4S    |
| C | PTGS1    | PTGS2    | CCL2   | CCL3  | CCL4  | IL-8   | IL-1A  | IL-1B  | IL-6     | IL-10    | IFNA1    | IFNA2    |
| D | IFNA4    | IFNA5    | IFNA6  | IFNA7 | IFNA8 | IFNA10 | IFNA14 | IFNA16 | IFNA17   | IFNA21   | IFNAR1   | IFNAR2   |
| E | IFNB1    | IFNG     | IFNW1  | TNF   | PDGFA | PDGFB  | PDGFC  | PDGFD  | TGFA     | TGFB1    | TGFB2    | TGFB3    |
| F | IGF1     | IGF2     | CSF2   | CSF3  | CSF1  | C2     | C3     | C4A    | C4B      | C6       | C9       | PAFAH1B1 |
| G | PAFAH1B2 | PAFAH1B3 | PAFAH2 | CRP   | CP    | CFB    | F8     | F11    | F12      | DRD4     | PDF      | HP       |
| H | PPIA     | ACTB     | TBP    | B2M   | RPLP0 | HPRT1  | TFRC   | GUS    | POS CONT | POS CONT | NEG CONT | NEG CONT |

**Supplementary Table S2: AnyGenes Human inflammatory signaling pathway layout; genes within the same color belonging to the same pathway or family**
